# Supplementary material
Source: bioRxiv or medRxiv preprint supplement (https://www.biorxiv.org/highwire/filestream/139099/field_highwire_adjunct_files/1/458836-2.pdf)
Supplement: Supplementary file [file 458836-2.pdf]

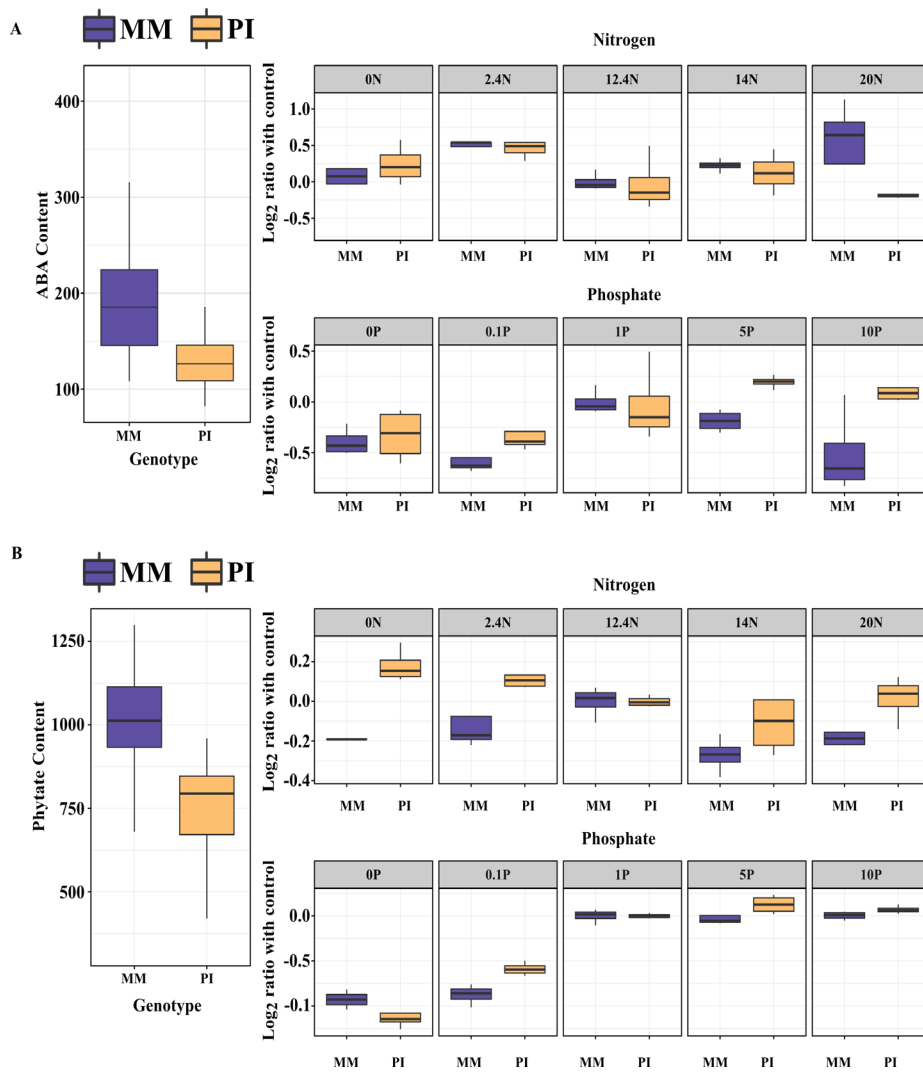

**Fig. S2.** Effects of maternal nutritional environments on ABA (**A**) and Phytate (**B**) content of both **MM** and **PI** seeds developed in different concentrations of nitrate (0N, 2.4N, 12.4N, 14N and 20N) and phosphate (0P, 0.1P, 1P, 5P and 10P).
